# Supplementary material for: Cause-specific neonatal mortality: analysis of 3772 neonatal deaths in Nepal, Bangladesh, Malawi and India
Source: PubMed Central journal article supplement (PMC4552925; doi:10.1136/archdischild-2014-307636), 2015-05-13
Supplement: fetalneonatal-2014-307636-s1.pdf [file fetalneonatal-2014-307636-s1.pdf]

**Table S1** 113 verbal autopsy indicators applicable to neonatal deaths in InterVA and their availability (✓) in the peri/neonatal VA questionnaire used in each site.

| VA Indicator                                                                  | Dhanusha | MaiMwana | Ekjut | PCP | Maikhanda | Makwanpur | SNEHA |
|-------------------------------------------------------------------------------|----------|----------|-------|-----|-----------|-----------|-------|
| Was the deceased male?                                                        | ✓        | ✓        | ✓     | ✓   | ✓         | ✓         | ✓     |
| Was the deceased female?                                                      | ✓        | ✓        | ✓     | ✓   | ✓         | ✓         | ✓     |
| Was (s)he aged 28 days or less at death?                                      | ✓        | ✓        | ✓     | ✓   | ✓         | ✓         | ✓     |
| Did the baby die within 24 hours of birth?                                    | ✓        | ✓        | ✓     | ✓   | ✓         | ✓         | ✓     |
| Did baby die more than 24 hours after but less than 48 hours from birth?      | ✓        | ✓        | ✓     | ✓   | ✓         | ✓         | ✓     |
| Did baby die more than 48 hours from birth but within the first week of life? | ✓        | ✓        | ✓     | ✓   | ✓         | ✓         | ✓     |
| Did baby die after first week, but within first 28 days?                      | ✓        | ✓        | ✓     | ✓   | ✓         | ✓         | ✓     |
| Was there any diagnosis of Measles?                                           |          |          |       |     |           |           |       |
| Did (s)he die during the wet season?                                          | ✓        | ✓        | ✓     | ✓   | ✓         | ✓         | ✓     |
| Did (s)he die during the dry season?                                          | ✓        | ✓        | ✓     | ✓   | ✓         | ✓         | ✓     |
| Did (s)he have a fever?                                                       | ✓        | ✓        | ✓     | ✓   | ✓         | ✓         | ✓     |
| Did (s)he have fever for less than 2 weeks before death?                      | ✓        | ✓        | ✓     | ✓   | ✓         | ✓         | ✓     |
| Did (s)he have fever for 2 weeks or more before death?                        | ✓        | ✓        | ✓     | ✓   | ✓         | ✓         | ✓     |
| Did (s)he have a cough?                                                       |          |          | ✓     | ✓   |           | ✓         |       |
| Did (s)he have a cough for less than 3 weeks before death?                    |          |          |       |     |           | ✓         |       |
| Did (s)he make a whooping sound when coughing?                                |          |          |       |     |           |           |       |
| Did (s)he have any breathing problem?                                         | ✓        | ✓        | ✓     | ✓   | ✓         | ✓         | ✓     |
| Did (s)he have fast breathing?                                                | ✓        | ✓        | ✓     | ✓   | ✓         | ✓         | ✓     |
| Did (s)he have fast breathing for less than 2 weeks?                          |          | ✓        |       |     | ✓         | ✓         | ✓     |
| Did (s)he have breathlessness?                                                |          |          |       |     |           |           | ✓     |
| Did (s)he have breathlessness for less than 2 weeks?                          |          |          |       |     |           |           | ✓     |
| Did you see the lower chest wall/ribs being pulled in as the child breathed?  | ✓        | ✓        | ✓     | ✓   | ✓         |           | ✓     |
| Did (s)he have noisy breathing (grunting or wheezing)?                        | ✓        | ✓        |       | ✓   |           | ✓         | ✓     |
| Did (s)he have diarrhoea?                                                     | ✓        | ✓        | ✓     | ✓   | ✓         | ✓         | ✓     |
| Did (s)he have diarrhoea for less than 2 weeks?                               | ✓        | ✓        | ✓     | ✓   | ✓         | ✓         | ✓     |
| Did (s)he have diarrhoea for 2 to 4 weeks?                                    | ✓        | ✓        | ✓     | ✓   | ✓         | ✓         | ✓     |
| At any time during the final illness was there blood in the stools?           | ✓        | ✓        | ✓     | ✓   | ✓         | ✓         |       |
| Did (s)he vomit?                                                              | ✓        | ✓        | ✓     | ✓   | ✓         | ✓         | ✓     |

|                                                                                                        |   |   |   |   |   |   |   |
|--------------------------------------------------------------------------------------------------------|---|---|---|---|---|---|---|
| Did (s)he vomit "coffee grounds" or bright red/blood?                                                  |   |   |   |   |   |   |   |
| Did (s)he have any abdominal problem?                                                                  |   |   | ✓ | ✓ |   | ✓ | ✓ |
| Did (s)he have a more than usually protruding abdomen?                                                 |   |   |   | ✓ |   |   | ✓ |
| Did (s)he have a more than usually protruding abdomen for less than 2 weeks?                           |   |   |   |   |   |   |   |
| Did (s)he have convulsions?                                                                            | ✓ | ✓ | ✓ | ✓ | ✓ | ✓ | ✓ |
| Did the convulsions last for less than 10 minutes?                                                     |   |   |   |   |   |   |   |
| Did the convulsions last for 10 minutes or more?                                                       |   |   |   |   |   |   |   |
| Did (s)he have any skin problems?                                                                      | ✓ |   | ✓ | ✓ | ✓ | ✓ | ✓ |
| Did (s)he have any ulcers, abscess or sores anywhere except on the feet?                               |   |   |   |   |   |   |   |
| Did (s)he have any ulcers, abscess or sores on the feet that were not also on other parts of the body? |   |   |   |   |   |   |   |
| During the illness that led to death, did (s)he have any skin rash?                                    | ✓ | ✓ |   |   | ✓ |   |   |
| Did (s)he have the skin rash for less than 1 week?                                                     |   |   |   |   |   |   |   |
| Did (s)he have the skin rash for 1 week or more?                                                       |   |   |   |   |   |   |   |
| Did (s)he have measles rash?                                                                           |   |   |   |   |   |   |   |
| Did (s)he have yellow discoloration of the eyes?                                                       | ✓ | ✓ |   |   | ✓ | ✓ | ✓ |
| Did (s)he look pale (thinning/lack of blood) or have pale palms, eyes or nail beds?                    |   |   |   |   |   |   |   |
| Was the child part of a multiple birth?                                                                | ✓ | ✓ | ✓ | ✓ | ✓ | ✓ | ✓ |
| Was the child born in a complicated delivery?                                                          | ✓ | ✓ | ✓ | ✓ | ✓ | ✓ | ✓ |
| Was the baby born 24 hours or more after the water broke?                                              | ✓ |   |   | ✓ |   | ✓ | ✓ |
| Did the baby stop moving in the womb before labour started?                                            | ✓ | ✓ | ✓ | ✓ |   |   |   |
| Was baby born in a normal vaginal delivery?                                                            | ✓ | ✓ | ✓ | ✓ | ✓ | ✓ | ✓ |
| Was baby born with forceps/vacuum?                                                                     | ✓ | ✓ | ✓ | ✓ | ✓ | ✓ | ✓ |
| Was baby delivered by Caesarean section?                                                               | ✓ | ✓ | ✓ | ✓ | ✓ | ✓ | ✓ |
| Did the baby's bottom, feet, arm or hand come into the vagina before its head?                         | ✓ | ✓ | ✓ | ✓ | ✓ | ✓ | ✓ |
| Was the baby of abnormal size?                                                                         | ✓ | ✓ | ✓ | ✓ | ✓ | ✓ | ✓ |
| Was the baby smaller than normal, weighing under 2.5 kg?                                               | ✓ | ✓ | ✓ | ✓ | ✓ | ✓ | ✓ |
| Was the baby larger than normal, weighing over 4.5 kg?                                                 | ✓ | ✓ | ✓ | ✓ | ✓ | ✓ | ✓ |

|                                                                                                      |   |   |   |   |   |   |   |
|------------------------------------------------------------------------------------------------------|---|---|---|---|---|---|---|
| Had the pregnancy lasted less than 34 weeks when the baby was born?                                  | ✓ | ✓ | ✓ | ✓ | ✓ | ✓ | ✓ |
| Had the pregnancy lasted between 34 and 37 weeks when the baby was born?                             | ✓ | ✓ | ✓ | ✓ | ✓ | ✓ | ✓ |
| Had the pregnancy lasted more than 37 weeks when the baby was born?                                  | ✓ | ✓ | ✓ | ✓ | ✓ | ✓ | ✓ |
| Was the umbilical cord wrapped several times (more than once) around the neck of the child at birth? |   |   |   |   |   |   | ✓ |
| Did the baby/the child have any noticeable malformation?                                             | ✓ | ✓ | ✓ | ✓ | ✓ | ✓ | ✓ |
| Did the baby/the child have a swelling/defect on the back?                                           | ✓ | ✓ | ✓ | ✓ | ✓ |   | ✓ |
| Did the baby/the child have a very large head?                                                       |   |   |   |   |   |   |   |
| Did the baby/the child have a very small head?                                                       | ✓ | ✓ | ✓ | ✓ | ✓ | ✓ | ✓ |
| Was the baby blue in colour at birth?                                                                |   |   | ✓ | ✓ |   | ✓ |   |
| Did the baby cry after birth, even if only a little bit?                                             | ✓ | ✓ |   | ✓ |   | ✓ | ✓ |
| Did the baby breathe after birth, even a little?                                                     | ✓ | ✓ | ✓ | ✓ | ✓ | ✓ | ✓ |
| Was the baby given assistance to breathe at birth?                                                   | ✓ | ✓ | ✓ | ✓ | ✓ | ✓ | ✓ |
| If the baby did not cry or breathe, was it born dead?                                                | ✓ | ✓ | ✓ | ✓ | ✓ | ✓ | ✓ |
| Was the dead baby macerated, that is, showed signs of decay?                                         | ✓ | ✓ | ✓ | ✓ | ✓ | ✓ | ✓ |
| Was the baby able to suckle or bottle-feed within the first 24 hours after birth?                    | ✓ | ✓ | ✓ | ✓ | ✓ | ✓ | ✓ |
| Did the baby stop suckling or bottle feeding 3 days after birth?                                     | ✓ | ✓ | ✓ | ✓ | ✓ |   | ✓ |
| Did the baby have convulsions starting within the first day of life?                                 | ✓ | ✓ | ✓ | ✓ | ✓ | ✓ | ✓ |
| Did the baby have convulsions starting on the second day or later after birth?                       | ✓ | ✓ | ✓ | ✓ | ✓ | ✓ | ✓ |
| Did the baby's body become stiff, with the back arched backwards?                                    | ✓ | ✓ | ✓ | ✓ | ✓ | ✓ | ✓ |
| Did the child have a bulging or raised fontanelle?                                                   | ✓ | ✓ | ✓ | ✓ | ✓ | ✓ | ✓ |
| Did the child have a sunken fontanelle?                                                              | ✓ | ✓ | ✓ | ✓ | ✓ | ✓ |   |
| Did the baby become unresponsive or unconscious soon after birth (within less than 24 hours)?        | ✓ | ✓ | ✓ | ✓ |   |   | ✓ |
| Did the baby become unresponsive or unconscious more than 1 day after birth?                         |   | ✓ | ✓ | ✓ |   |   | ✓ |
| Did the baby become cold to the touch before it died?                                                | ✓ | ✓ | ✓ | ✓ | ✓ | ✓ | ✓ |

|                                                                                                              |   |   |   |   |   |   |   |
|--------------------------------------------------------------------------------------------------------------|---|---|---|---|---|---|---|
| Did the baby have redness or discharge from the umbilical cord stump?                                        | ✓ | ✓ | ✓ | ✓ | ✓ | ✓ | ✓ |
| Did the baby have yellow palms or soles?                                                                     | ✓ | ✓ | ✓ | ✓ |   |   | ✓ |
| Did the mother NOT receive tetanus toxoid (TT) vaccine?                                                      |   |   | ✓ | ✓ |   |   |   |
| Was this baby born from the mother's first pregnancy?                                                        |   |   | ✓ | ✓ |   | ✓ | ✓ |
| Did the mother have 4 or more births before this baby was born?                                              |   |   | ✓ | ✓ |   |   | ✓ |
| During pregnancy, did the baby's mother suffer from high blood pressure?                                     |   |   | ✓ |   |   | ✓ | ✓ |
| Did the baby's mother have foul smelling vaginal discharge during pregnancy or after delivery?               |   |   | ✓ | ✓ |   | ✓ |   |
| During the last 3 months of pregnancy, did the baby's mother suffer from convulsions?                        |   |   | ✓ | ✓ |   | ✓ | ✓ |
| During the last 3 months of pregnancy did the baby's mother suffer from blurred vision?                      |   |   | ✓ | ✓ |   | ✓ |   |
| Did the baby's mother have vaginal bleeding during the last 3 months of pregnancy but before labour started? |   |   | ✓ | ✓ |   | ✓ | ✓ |
| Was the child born in a health facility?                                                                     | ✓ | ✓ | ✓ | ✓ | ✓ | ✓ | ✓ |
| Was the child born at home?                                                                                  | ✓ | ✓ | ✓ | ✓ | ✓ | ✓ | ✓ |
| Was the child born somewhere else, e.g. on the way to a facility?                                            | ✓ | ✓ |   | ✓ | ✓ | ✓ | ✓ |
| Did the mother receive professional assistance during the delivery?                                          | ✓ | ✓ | ✓ | ✓ | ✓ | ✓ | ✓ |
| Did (s)he suffer from any injury or accident that led to her/his death?                                      | ✓ |   | ✓ | ✓ | ✓ | ✓ | ✓ |
| Was it a road traffic accident?                                                                              | ✓ |   |   |   |   |   |   |
| Was (s)he Injured in a non-road transport accident?                                                          |   |   |   |   |   |   |   |
| Was (s)he Injured in a fall?                                                                                 | ✓ |   |   |   |   |   |   |
| Did (s)he die of drowning?                                                                                   | ✓ |   |   |   |   |   |   |
| Did (s)he suffer from burns?                                                                                 | ✓ |   |   |   |   |   |   |
| Did (s)he suffer from any plant/ animal/insect bite or sting that led to her/his death?                      | ✓ |   |   |   |   |   |   |
| Was (s)he injured by a force of nature?                                                                      |   |   |   |   |   |   |   |
| Was there any poisoning?                                                                                     | ✓ |   |   |   |   |   |   |
| Was (s)he subject to violence/assault?                                                                       |   |   |   |   |   |   |   |
| Was the injury intentionally inflicted by someone else?                                                      |   |   |   |   |   |   |   |
| Was (s)he adequately vaccinated?                                                                             | ✓ | ✓ |   |   | ✓ |   |   |
| Did (s)he receive any treatment for the illness that led to death?                                           | ✓ |   |   |   |   |   | ✓ |

|                                                                  |  |  |  |  |  |  |   |
|------------------------------------------------------------------|--|--|--|--|--|--|---|
| Did (s)he receive oral rehydration salts?                        |  |  |  |  |  |  |   |
| Did (s)he receive (or need) intravenous fluids (drip) treatment? |  |  |  |  |  |  | ✓ |
| Did (s)he receive (or need) a blood transfusion?                 |  |  |  |  |  |  |   |
| Did (s)he receive (or need) injectable antibiotics?              |  |  |  |  |  |  |   |
| Did (s)he have (or need) an operation for the illness?           |  |  |  |  |  |  |   |
| Did (s)he have the operation within 1 month before death?        |  |  |  |  |  |  |   |
| Was (s)he discharged from hospital very ill?                     |  |  |  |  |  |  |   |
